# Supplementary material for: Electric field-controlled reversible high-temperature perpendicular magnetic anisotropy in cobaltate–manganite heterostructures
Source: Royal Society of Chemistry journal article supplement (doi:10.1039/d2tc01600a), 2022-01-01
Supplement: d2tc01600a1.pdf [file d2tc01600a1.pdf]

## Supporting Information

### **Electric-field controlled reversible high-temperature perpendicular magnetic anisotropy in cobaltate-manganite heterostructures**

**Huihui Ji,<sup>‡a</sup> Zhi Yan,<sup>‡a</sup> Guowei Zhou,<sup>‡\*ab</sup> Penghua Kang,<sup>a</sup> Zhilan Li,<sup>a</sup> and Xiaohong Xu<sup>\*ab</sup>**

<sup>a</sup> *School of Chemistry and Materials Science of Shanxi Normal University & Key Laboratory of Magnetic Molecules and Magnetic Information Materials of Ministry of Education, Taiyuan 030000, China. E-mail: [xuxh@sxnu.edu.cn](mailto:xuxh@sxnu.edu.cn)*

<sup>b</sup> *Research Institute of Materials Science of Shanxi Normal University & Collaborative Innovation Center for Shanxi Advanced Permanent Magnetic Materials and Technology, Taiyuan 030000, China. E-mail: [zhougw@sxnu.edu.cn](mailto:zhougw@sxnu.edu.cn)*

<sup>‡</sup> These authors contributed equally.

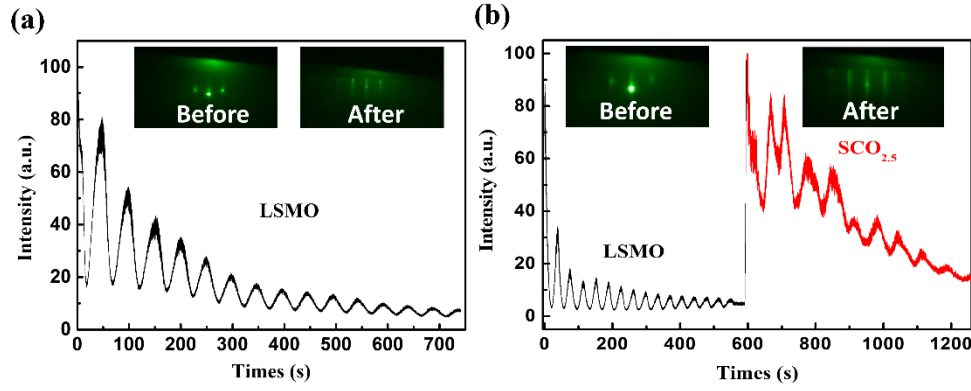

Fig. S1 RHEED oscillation curves of single LSMO films and B-SCO/LSMO bilayer. Insets are the Rheed patterns of films during the deposition.

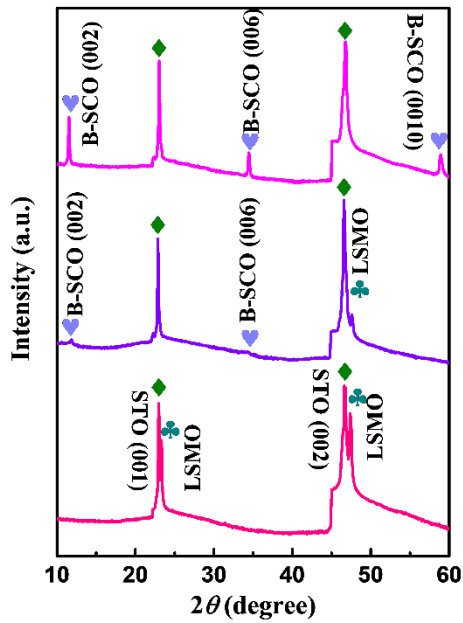

Fig. S2 X-ray diffraction spectra of LSMO single films (bottom, 100u.c.), B-SCO (20 u.c.)/LSMO (20 u.c.) bilayer (middle) and single B-SCO films (top, 100 u.c.) between the range of 10-60 degree.

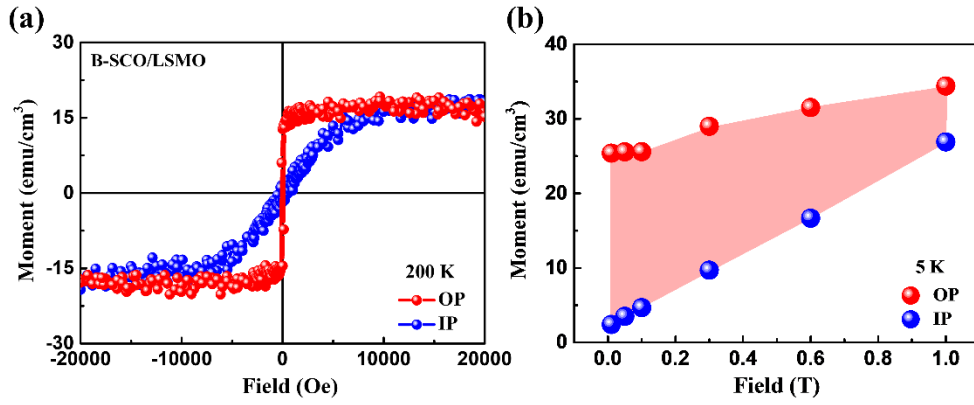

Fig. S3 (a) Field dependence of moment for B-SCO/LSMO at 200 K. (b) The moment as a function of field of B-SCO/LSMO bilayer. The data is obtained from the Fig. 3(a) at 5 K.

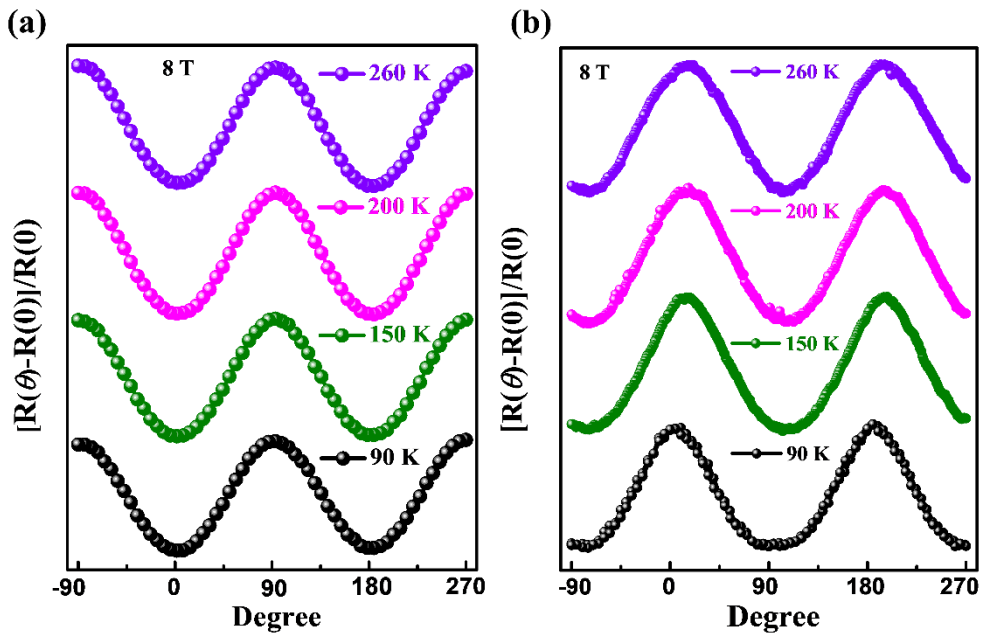

Fig. S4 Angular dependence of magnetoresistance of single LSMO films (a) and B-SCO/LSMO bilayer at different temperature.

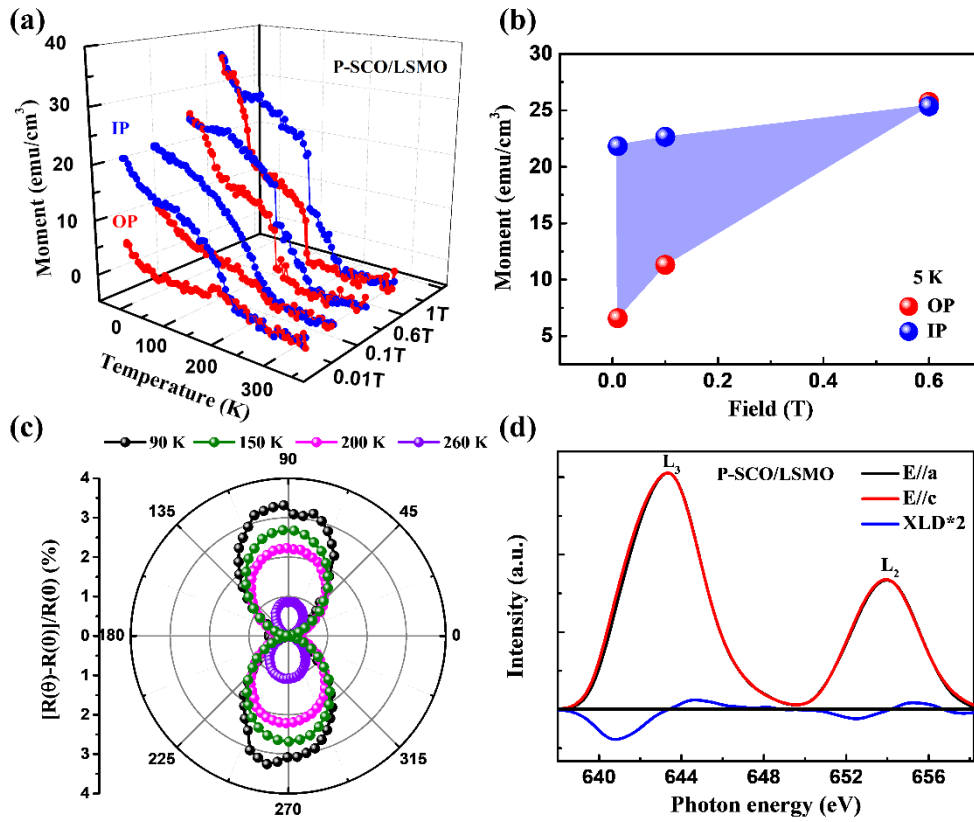

Fig. S5 (a) In-plane and out-of-plane moment versus temperature curve of P-SCO/LSMO bilayer. (b) Moment as function of field of P-SCO/LSMO bilayer. (c) The polar plots of angular dependence of magnetoresistance of P-SCO/LSMO bilayer, measured at different temperature. (d) XLD spectra of Mn *L*-edge of P-SCO/LSMO bilayer.
